# Supplementary material for: Self-reported sleep quality and depression in post myocardial infarction patients attending cardiology outpatient clinics in Oman
Source: PubMed Central journal article supplement — Int J Nurs Sci. 2019 Jun 21;6(4):371–7. doi: 10.1016/j.ijnss.2019.06.008 (PMC6838964; doi:10.1016/j.ijnss.2019.06.008), 2019-06-21
Supplement: mmc1.pdf [file mmc1.pdf]

# 阿曼心肌梗死患者的睡眠质量和抑郁状况调查

Rashid Said Saif Almamari, Joshua Kanaabi Muliira, Eilean Rathinasamy Lazarus

## 【摘要】

**目的** 调查阿曼心脏病门诊随访的心肌梗死后患者的睡眠质量和抑郁状况。

**方法** 采用横断面调查研究，收集在心脏病门诊接受随访治疗的心肌梗死患者 ( $n = 180$ )，这些患者诊断为心肌梗死后至少 4 周。分别使用阿拉伯语版匹兹堡睡眠质量指数和患者健康问卷-9 评估患者的睡眠质量和抑郁症状。

**结果** 本组患者平均年龄 ( $62.0 \pm 11.3$ ) 岁。61.1% 的患者睡眠质量差，其睡眠质量与性别 ( $P \leq 0.05$ )，体质指数 ( $P \leq 0.05$ ) 和规律锻炼相关 ( $P \leq 0.01$ )。受影响较大的睡眠质量维度是入睡时间、睡眠时间和干扰。5% 的患者有重度抑郁，再梗死的发生率为 27.2%。患者抑郁症状与自我报告的规律锻炼有关 ( $P \leq 0.01$ )。

**结论** 患者发生心肌梗死后睡眠质量较差，抑郁发生率较低。患者睡眠质量或抑郁与心肌梗死复发之间没有明显关系。

**【关键词】** 出院后医疗；抑郁；心肌梗死；阿曼；入睡和睡眠障碍

通信作者：Joshua Kanaabi Muliira, E-mail: [jkmuliira@gmail.com](mailto:jkmuliira@gmail.com)
